# Supplementary material for: The Emergent Course of Bipolar Disorder: Observations Over Two Decades From the Canadian High-Risk Offspring Cohort
Source: Atypon-hosted journal article supplement (doi:10.1176/appi.ajp.2018.18040461), 2018-12-11

### **Definition of Subthreshold Clinically Significant Symptoms**

Clinically significant subthreshold hypomanic symptoms: participant endorsed a minimum of three DSM-IV hypomanic symptoms but did not meet full criteria for a hypomanic or bipolar disorder not otherwise specified episode based on duration or severity; ii) symptoms represented a clear change from normal functioning, endorsed by self and others that knew the person well; and iii) no evidence of major impairment.

Clinically significant subthreshold depressive symptoms: participant endorsed a minimum of three DSM-IV depressive symptoms one of which included depressed mood but did not meet full criteria for a major depressive episode or depression not otherwise specified based on duration or severity; (ii) symptoms represented a clear change from normal functioning, endorsed by self and others that knew the person well; and (iii) no evidence of major impairment.

Clinically significant subthreshold anxiety symptoms: participant endorsed a minimum of three DSM-IV anxiety symptoms one of which was feeling anxious but did not meet full criteria for an anxiety disorder or anxiety not otherwise specified based on duration or severity; (ii) symptoms represented a clear change from normal functioning, endorsed by self and others that knew the person well; and (iii) no evidence of major impairment.

Clinically significant subthreshold sleep symptoms: participant endorsed a minimum of three DSM-IV sleep symptoms but did not meet full criteria for a sleep disorder diagnosis based on duration or severity; (ii) symptoms represented a clear change from normal functioning, endorsed by self and possibly by others that knew the person well; and (iii) no evidence of major impairment.

Clinically significant subthreshold substance use symptoms: participant endorsed a minimum of three DSM-IV substance abuse symptoms, but did not meet full criteria for a substance use disorder diagnosis; (ii) symptoms were a concern to self and/or others who knew the person well; (iii) no evidence of major impairment.

Psychotic sub-threshold symptoms: participant endorsed hallucinations or delusions on assessment, but did not meet criteria for a psychotic episode; and (ii) presence of psychotic symptoms confirmed on blind consensus review of all available clinical and research information.

## SUPPLEMENTARY TABLES

**TABLE S1.** Descriptive characteristics of the affected parents

|                                                            | <b>Lithium Responders (n=45)</b> | <b>Lithium Non-Responders (n=71)</b> | <b>p</b>                  |
|------------------------------------------------------------|----------------------------------|--------------------------------------|---------------------------|
| <b>Age of affected parent at recruitment</b>               |                                  |                                      |                           |
| Mean Years (SD)                                            | 48.29 (6.62)                     | 46.53 (7.12)                         | 0.1884 <sup>a</sup>       |
| <b>Age of parent illness onset</b>                         |                                  |                                      |                           |
| Mean Years (SD)                                            | 27.82 (9.29)                     | 24.63 (10.16)                        | 0.0930 <sup>a</sup>       |
| <b>Sex of affected parent</b>                              |                                  |                                      |                           |
| Male n(%)                                                  | 24 (53.3)                        | 30 (42.3)                            | 0.2437 <sup>b</sup>       |
| Female n(%)                                                | 21 (46.7)                        | 41 (57.8)                            |                           |
| <b>Affected parent lifetime mood diagnosis n(%)</b>        |                                  |                                      |                           |
| BPI                                                        | 20 (44.4)                        | 28 (39.4)                            | 0.1193 <sup>b</sup>       |
| BPII                                                       | 14 (31.1)                        | 34 (47.9)                            |                           |
| Depressive Disorder <sup>c</sup>                           | 11 (24.4)                        | 9 (12.7)                             |                           |
| <b>Affected parent comorbidity<sup>d</sup></b>             |                                  |                                      |                           |
| Yes n(%)                                                   | 10 (25.0)                        | 27 (45.8)                            | <b>0.0361<sup>b</sup></b> |
| No n(%)                                                    | 30 (75.0)                        | 32 (54.2)                            |                           |
| <b>Substance use disorders</b>                             |                                  |                                      |                           |
| Yes n(%)                                                   | 5 (12.5)                         | 19 (32.8)                            | <b>0.0219<sup>b</sup></b> |
| No n(%)                                                    | 35 (87.5)                        | 39 (67.2)                            |                           |
| <b>Anxiety disorders</b>                                   |                                  |                                      |                           |
| Yes n(%)                                                   | 5 (12.5)                         | 16 (27.6)                            | 0.0736 <sup>b</sup>       |
| No n(%)                                                    | 35 (87.5)                        | 42 (72.4)                            |                           |
| <b>Parent lifetime hospitalization</b>                     |                                  |                                      |                           |
| Yes n(%)                                                   | 24 (60.0)                        | 32 (53.3)                            | 0.5106 <sup>b</sup>       |
| No n(%)                                                    | 16 (40.0)                        | 28 (46.7)                            |                           |
| <b>Parent lifetime psychotic features in mood episodes</b> |                                  |                                      |                           |
| Yes n(%)                                                   | 11 (24.4)                        | 33 (46.5)                            | <b>0.0172<sup>b</sup></b> |
| No n(%)                                                    | 34 (75.6)                        | 38 (53.5)                            |                           |

| Affected parent clinical course        |           |           |                       |
|----------------------------------------|-----------|-----------|-----------------------|
| Episodic Fully remitting<br>n(%)       | 33 (73.3) | 11 (15.5) | <0.0001 <sup>b*</sup> |
| Episodic with residual symptom<br>n(%) | 10 (22.2) | 44 (62.0) |                       |
| Chronic/chronic fluctuating<br>n(%)    | 2 (4.4)   | 16 (22.5) |                       |
|                                        |           |           |                       |

<sup>a</sup> t-test; <sup>b</sup> Chi-square test; <sup>c</sup> sibling of the bipolar proband; <sup>d</sup> any lifetime diagnosis

**TABLE S2.** Polarity of first five mood episodes in high-risk offspring with lifetime bipolar diagnosis comparing between Lithium responsive (LiR) vs Lithium non-responsive (LiNR) subgroups

|                    | LiR offspring | LiNR offspring | p     |
|--------------------|---------------|----------------|-------|
| <b>Episode 1</b>   |               |                | 1.000 |
| Activated<br>n (%) | 2 (12.50)     | 3 (12.00)      |       |
| Depressive<br>n(%) | 14 (87.50)    | 22 (88.00)     |       |
| <b>Episode 2</b>   |               |                | 0.743 |
| Activated<br>n (%) | 9 (56.25)     | 10 (45.45)     |       |
| Depressive<br>n(%) | 7 (43.75)     | 12 (54.55)     |       |
| <b>Episode 3</b>   |               |                | 0.234 |
| Activated<br>n (%) | 2 (16.67)     | 7 (41.18)      |       |
| Depressive<br>n(%) | 10 (83.33)    | 10 (58.82)     |       |
| <b>Episode 4</b>   |               |                | 0.074 |
| Activated<br>n (%) | 1 (11.11)     | 7 (53.85)      |       |
| Depressive<br>n(%) | 8 (88.89)     | 6 (46.15)      |       |
| <b>Episode 5</b>   |               |                | 0.559 |
| Activated<br>n (%) | 1 (14.29)     | 3 (42.86)      |       |
| Depressive<br>n(%) | 6 (85.71)     | 4 (57.14)      |       |

Activated: DSM-IV manic/hypomanic episodes; Depressive: DSM-IV major depression

**TABLE S3.** The influence of clinically significant subthreshold symptoms and sex on the transition through clinical stages of emergent bipolar disorder in high-risk offspring

|                                      | Well→Stage 1<br>Non-Mood Disorders |               | Stage 1→Stage 2<br>Minor Mood &<br>Adjustment disorders |               | Stage 2→Stage 3<br>Depressive Disorders |               | Stage 3→Stage 4†<br>Bipolar Disorders |               |
|--------------------------------------|------------------------------------|---------------|---------------------------------------------------------|---------------|-----------------------------------------|---------------|---------------------------------------|---------------|
|                                      | Hazard Ratio<br>(95% CI)           | p             | Hazard Ratio<br>(95% CI)                                | p             | Hazard Ratio<br>(95% CI)                | p             | Hazard Ratio<br>(95% CI)              | p             |
| <b>Sub-threshold Anxiety</b>         | 1.016<br>(0.410, 2.514)            | 0.973         | 2.035<br>(0.844, 4.902)                                 | 0.113         | 0.747<br>(0.291, 1.917)                 | 0.544         | 0.637<br>(0.196, 2.072)               | 0.453         |
| <b>Sub-threshold Sleep</b>           | 2.606<br>(1.066, 6.372)            | <b>0.036*</b> | 0.756<br>(0.095, 6.022)                                 | 0.791         | 0.651<br>(0.224, 1.891)                 | 0.430         | 1.505<br>(0.062, 36.604)              | 0.802         |
| <b>Sub-threshold Depression</b>      | 1.373<br>(0.536, 3.519)            | 0.509         | 1.645<br>(0.557, 4.857)                                 | 0.368         | 1.078<br>(0.309, 3.761)                 | 0.907         | 1.025<br>(0.333, 3.155)               | 0.965         |
| <b>Sub-threshold Activation</b>      | 0.697<br>(0.145, 3.341)            | 0.652         | 0.604<br>(0.063, 5.749)                                 | 0.661         | 0.898<br>(0.257, 3.137)                 | 0.866         | 1.260<br>(0.536, 2.964)               | 0.596         |
| <b>Sub-threshold Substance Abuse</b> | 0.897<br>(0.197, 4.071)            | 0.888         | 1.813<br>(0.340, 9.675)                                 | 0.486         | 1.371<br>(0.437, 4.307)                 | 0.589         | 1.516<br>(0.492, 4.675)               | 0.469         |
| <b>Sex ( female)</b>                 | 1.295<br>(0.914, 1.834)            | 0.146         | 0.416<br>(0.230, 0.750)                                 | <b>0.004*</b> | 0.333<br>(0.154, 0.720)                 | <b>0.005*</b> | 0.718<br>(0.270, 1.910)               | 0.507         |
| <b>Psychotic symptoms</b>            | 2.863<br>(0.919, 8.923)            | 0.070         | --&                                                     | --            | --&                                     | --            | 3.364<br>(1.340, 8.444)               | <b>0.010*</b> |

†Due to low numbers of transitions into Stage 4, Firth's correction was used

&Non-estimable

## SUPPLEMENTARY FIGURES

**FIGURE S1A. Cumulative incidence of anxiety disorder in high-risk offspring compared to controls**

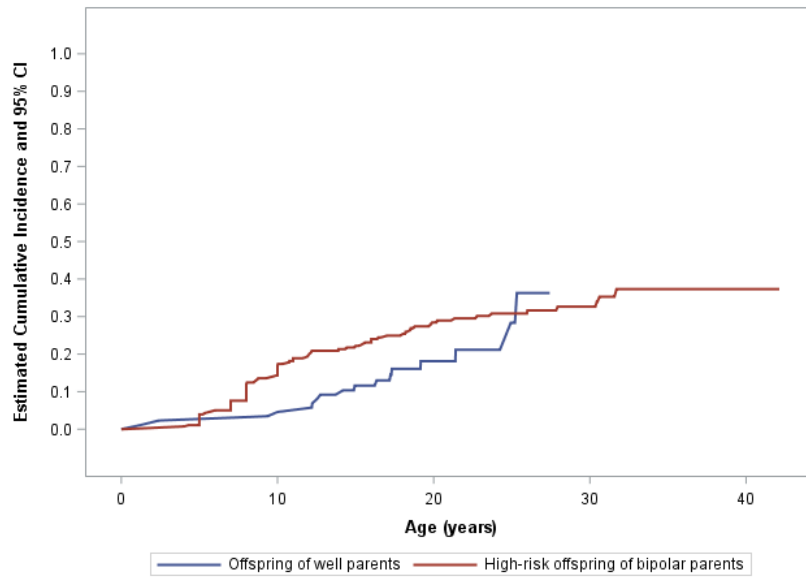

**FIGURE S1B. Cumulative incidence of substance use disorder in high-risk offspring compared to controls**

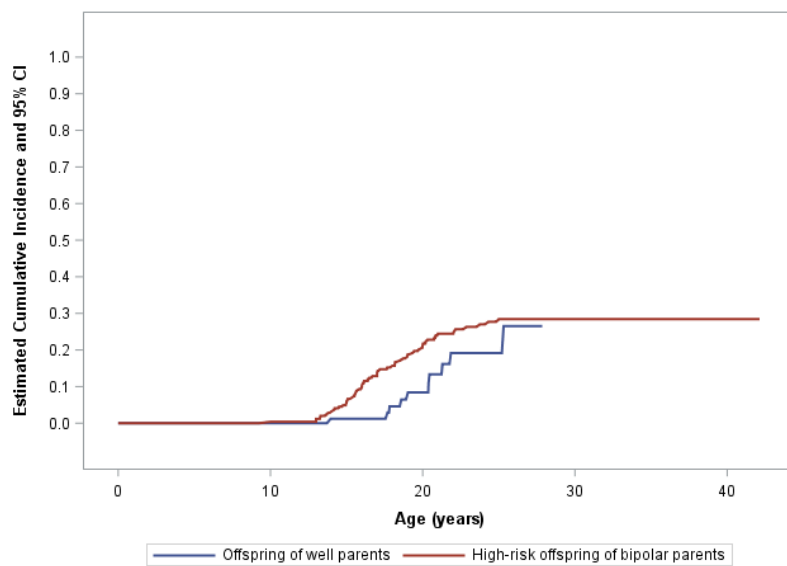

**FIGURE S2A.** Proportion of first mood episodes that were depressive in the early course of bipolar disorder in offspring of lithium responsive parents (LiR) and lithium non-responsive parents (LiNR)

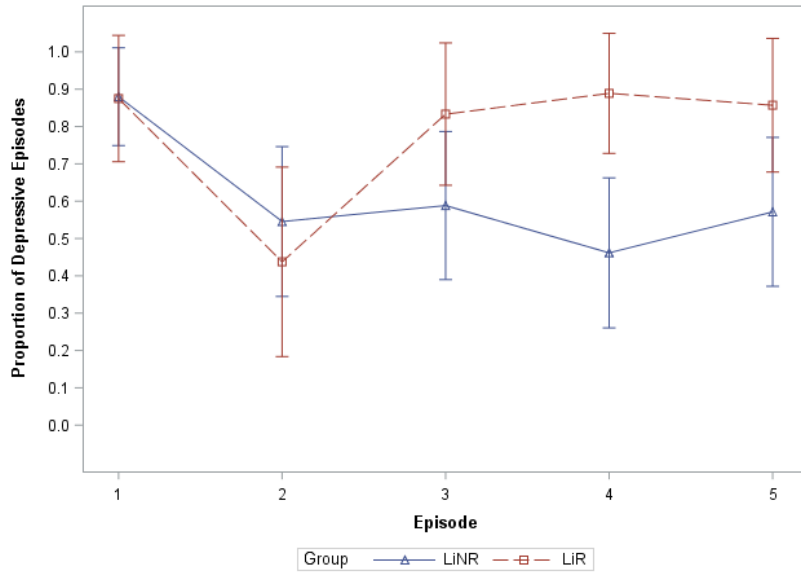

\*From a GLMM LiR group has increased odds of episodes being depressive compared to LiNR group

**FIGURE S2B.** Proportion of first mood episodes with psychotic features in the early course of BD in offspring of lithium responder (LiR) and lithium non-responder (LiNR) BD parents

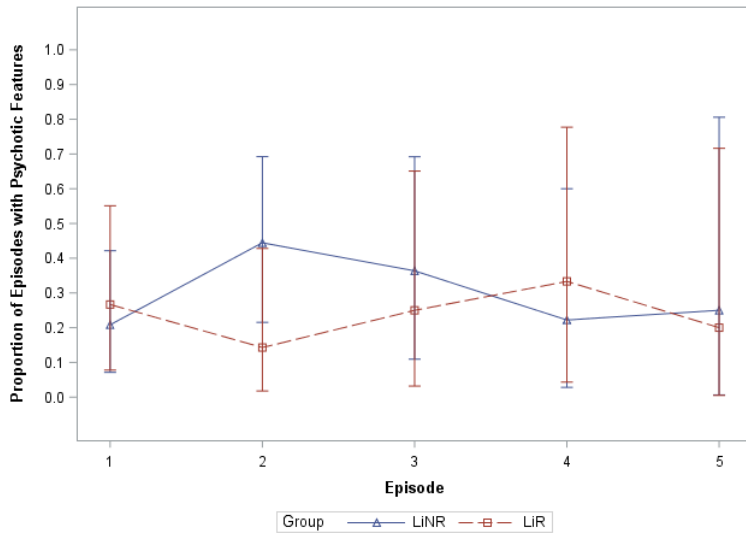

From a GLMM there was marginal evidence of statistical significance for episode two ( $p=0.053$ )

**FIGURE S3A.** Age distribution of high-risk and control offspring at recruitment

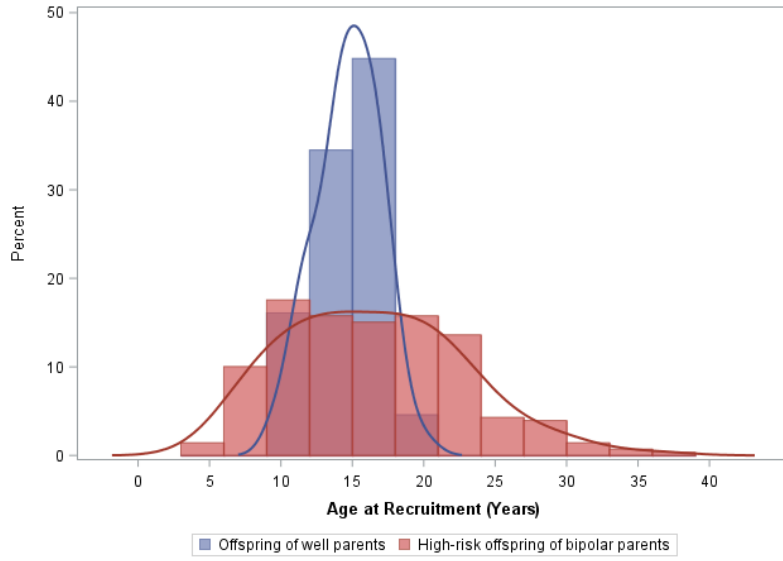

**FIGURE S3B.** Age distribution of high-risk and control offspring at last assessment

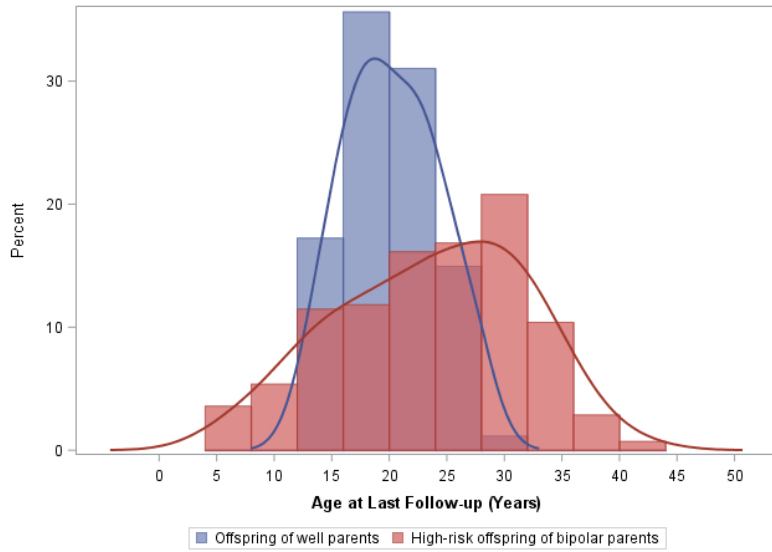

Supplement: appi.ajp.2018.18040461.ds001.pdf [file appi.ajp.2018.18040461.ds001.pdf]
