# Supplementary material for: The Emergent Course of Bipolar Disorder: Observations Over Two Decades From the Canadian High-Risk Offspring Cohort
Source: Atypon-hosted journal article supplement (doi:10.1176/appi.ajp.2018.18040461), 2018-12-11
Supplement: appi.ajp.2018.18040461.ds001.pdf [file appi.ajp.2018.18040461.ds001.pdf]

 


Psychiatry Online
